# Supplementary material for: CO2 Capture by Reduced Graphene Oxide Monoliths with Incorporated CeO2 Grafted with Functionalized Polymer Brushes
Source: MDPI journal article supplement (doi:10.3390/app112311154), 2021-11-24
Supplement: s1 [file s1]

# CO<sub>2</sub> Capture by Reduced Graphene Oxide Monoliths with Incorporated CeO<sub>2</sub> Grafted with Functionalized Polymer Brushes

Nikolaos Politakos <sup>1,\*</sup>, Luis Serrano Cantador <sup>2</sup>, Juan Antonio Cecilia <sup>3</sup>, Iranzu Barbarin <sup>1</sup>, and Radmila Tomovska <sup>1,4</sup>

- <sup>1</sup> POLYMAT, Facultad de Ciencias Químicas, University of the Basque Country UPV/EHU, Joxe Mari Korta Zentroa, Tolosa Etorbidea 72, 20018 Donostia-San Sebastián, Spain; [iranzu.barbarin@ehu.eus](mailto:iranzu.barbarin@ehu.eus) (I.B.); [radmila.tomovska@ehu.eus](mailto:radmila.tomovska@ehu.eus) (R.T.)
- <sup>2</sup> BioPren Group, Inorganic Chemistry and Chemical Engineering Department, Faculty of Sciences, University of Cordoba, 14014 Cordoba, Spain; [iq3secal@uco.es](mailto:iq3secal@uco.es) (L.S.C.)
- <sup>3</sup> Inorganic Chemistry, Crystallography and Mineralogy Department, University of Malaga, 29071 Malaga, Spain; [jacecilia@uma.es](mailto:jacecilia@uma.es) (J.A.C.)
- <sup>4</sup> Ikerbasque, The Basque Foundation for Science, Maria Diaz de Haro 3, 48013 Bilbao, Spain
- \* Correspondence: [nikolaos.politakos@ehu.eus](mailto:nikolaos.politakos@ehu.eus)

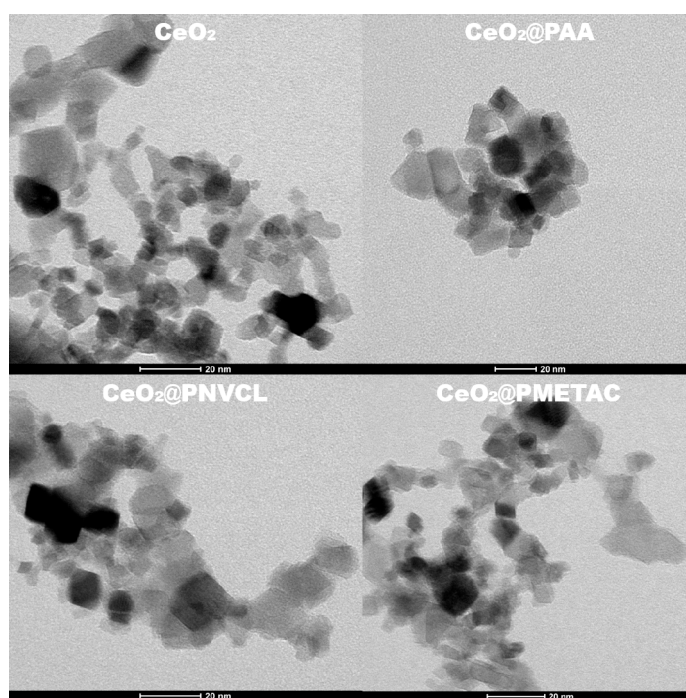

**Figure S1.** TEM images of the initial CeO<sub>2</sub> nanoparticles and with the different polymer brushes.

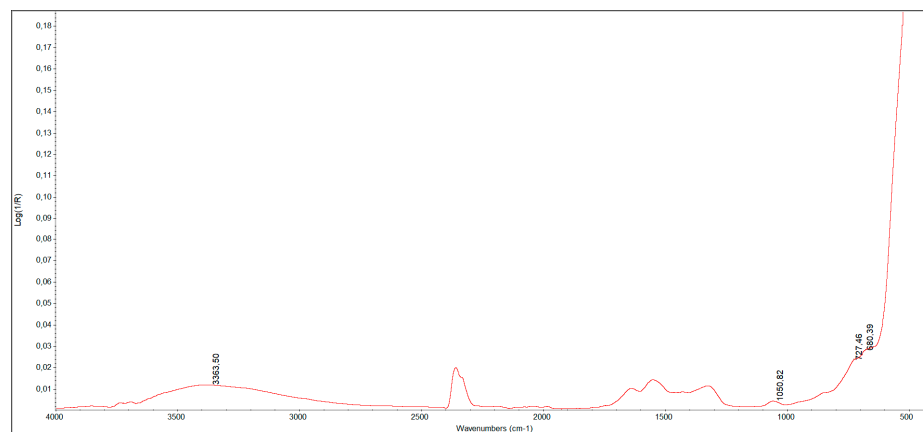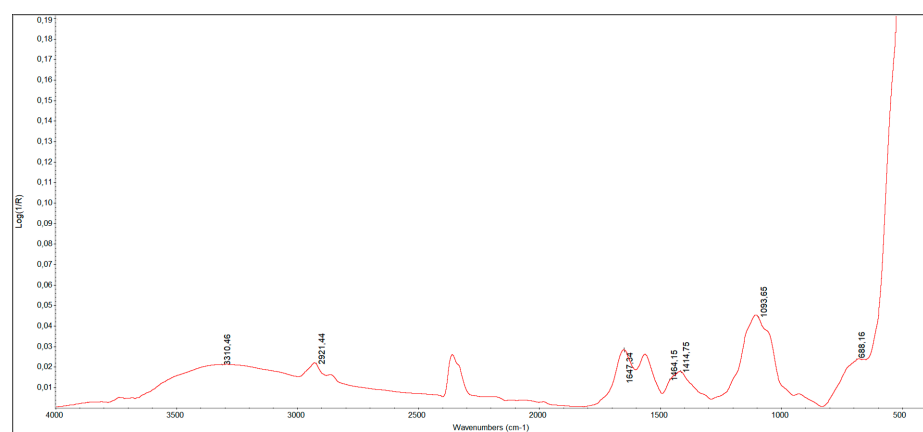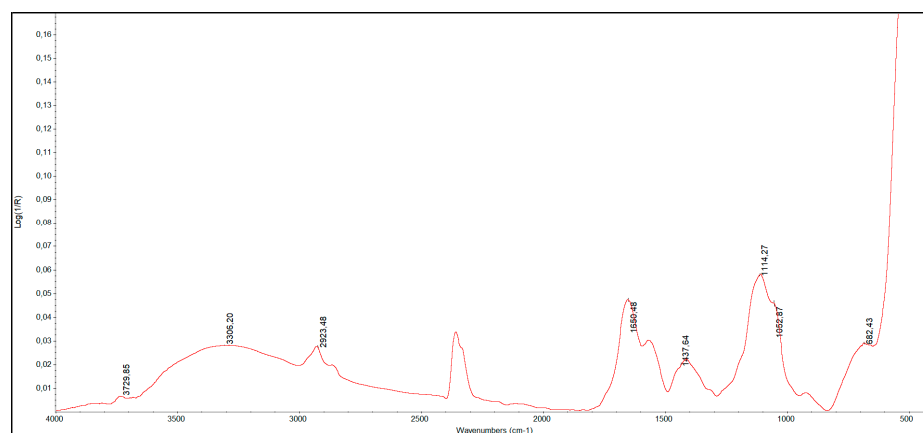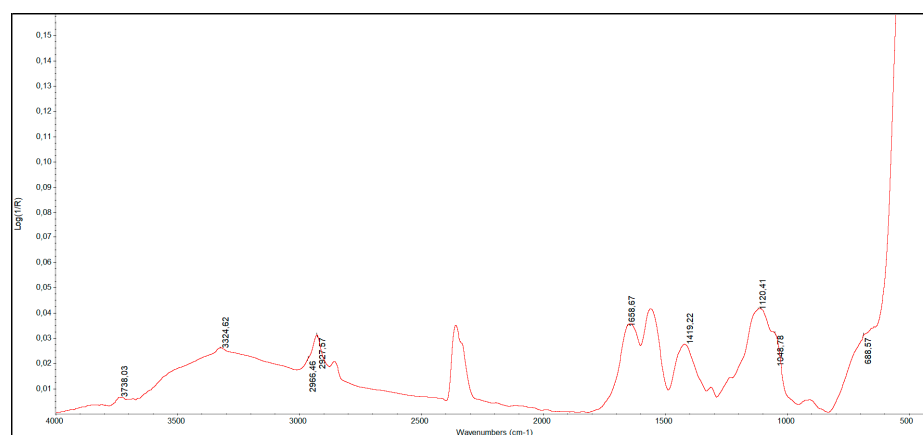

**Figure S2.** FTIR of all spectra, top to bottom for a)  $\text{CeO}_2$ , b)  $\text{CeO}_2@\text{PAA}$ , c)  $\text{CeO}_2@\text{PNVCL}$  and d)  $\text{CeO}_2@\text{PMETAC}$ .

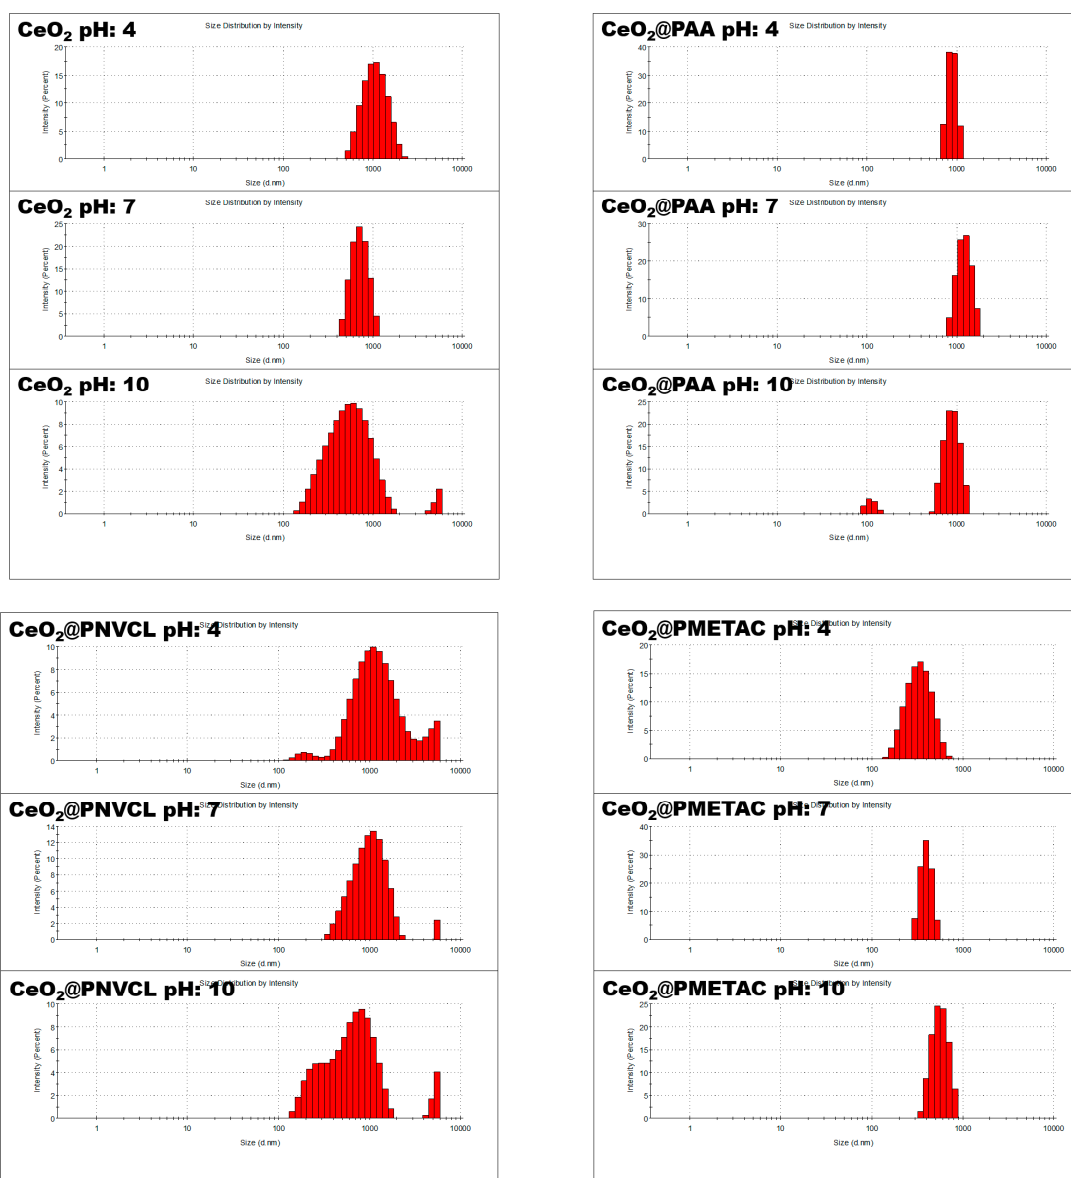

**Figure S3.** DLS size distribution by intensity for all samples and in all three pHs (4, 7 and 10).
